# Supplementary material
Source: PubMed Central journal article supplement (PMC4810828)

1 **Supplementary Material**

2

3 **Material and Method**

4 **Western blot analysis**

5 Thirty embryos were pooled as one sample in homogenization buffer (100 mM imidazole, 5  
6 mM EDTA, 200 mM sucrose, and 0.1% sodium deoxycholate; pH 7.6), and then  
7 homogenized. After centrifugation at 4°C and 10,000 rpm for 10 min, the supernatant (a  
8 volume equivalent to 50 µg protein) was supplemented with electrophoresis sample buffer  
9 (250 mM Tris base, 2 mM Na<sub>2</sub>EDTA, 2% SDS, and 5% dithiothreitol), and then incubated at  
10 95°C for 10 min. The denatured samples were subjected to 10% sodium dodecyl  
11 sulfate-polyacrylamide gel electrophoresis and then transferred to polyvinylidene difluoride  
12 membranes (Millipore, Billerica, MA). After blocking in blocking buffer, the blots were  
13 incubated overnight at 4°C with monoclonal anti-human estrogen-related alpha antibody  
14 (1:1000, #ab41868, Abcam). After washing in PBST, the membrane was incubated for 2 h in  
15 horseradish peroxidase-conjugated goat anti-mouse IgG (Jackson Laboratory, Bar Harbor,  
16 ME), diluted 1:2000 in PBST. The immunoreactive bands were detected by chemiluminescent  
17 reaction with WesternBright ECL HRP substrate (Advansta, Inc., Menlo Park, CA). The  
18 β-actin detected by a rabbit anti-β-actin antibody (1:1000, #ab8227; Abcam, Cambridge, UK)  
19 was used as an internal control.

20

21

22 **Supplementary Table**

23 **Table S1.** Primers used for Q-PCR.

| Gene            | Protein Name                                |   | Primer sequence                | Accession No.  |
|-----------------|---------------------------------------------|---|--------------------------------|----------------|
| <i>esrra</i>    | Estrogen-related receptor $\alpha$          | F | 5'- GCTACTCCCCACCCCTCTAC-3'    | NM_212955.1    |
|                 |                                             | R | 5'-TTAACGCATACTTGCAACGC-3'     |                |
| <i>atp6v1a</i>  | V-H <sup>+</sup> -ATPase subunit A          | F | 5'-GAGGAACCACTGCCATTCCA-3'     | NM_201135.2    |
|                 |                                             | R | 5'-CAACCCACATAAATGATGACATC-3'  |                |
| <i>slc4a1b</i>  | Anion exchanger 1b                          | F | 5'-ATCACCTTCGGAGGTCTGC-3'      | NM_001168266.1 |
|                 |                                             | R | 5'-ACAGGTTGAGCAGCGATCAG-3'     |                |
| <i>slc9a3.2</i> | Sodium-hydrogen exchanger 3b                | F | 5'-TGCAGACAGCGCCTCTAGC-3'      | NM_001113479.1 |
|                 |                                             | R | 5'-TGTGGCCTGTCTCTGTTTGC-3'     |                |
| <i>cyc1</i>     | Cytochrome c-1                              | F | 5'-CACCATGAGCCAGGTTGCTA-3'     | NM_001037393.2 |
|                 |                                             | R | 5'-TAAGCAGAGCACCAACCAAC-3'     |                |
| <i>cycsb</i>    | Cytochrome c, somatic b                     | F | 5'-GGCATTGTCTGGGGTGAAGA-3'     | NM_001002068.1 |
|                 |                                             | R | 5'-GATCTGCTCTCTCGCCCTTC-3'     |                |
| <i>atp5b</i>    | ATP synthase subunit beta,<br>mitochondrial | F | 5'- AGGGATTATGCTGCTCCTGC -3'   | NM_001024429.2 |
|                 |                                             | R | 5'-AGGGCATTGAGAATGGGTGG -3'    |                |
| <i>g6pd</i>     | Glucose-6-phosphate dehydrogenase           | F | 5'-AGCCTTCTGAAATGATGGGCA -3'   | XM_694076.6    |
|                 |                                             | R | 5'-ATCTGACTGGTGAAATGCGGT -3'   |                |
| <i>cs</i>       | Citrate synthase                            | F | 5'- TTCAACCTTCACTGCGAGC -3'    | NM_199598.1    |
|                 |                                             | R | 5'-CTTGGGGCTAGTCTGCTGAT-3'     |                |
| <i>rpl13a</i>   | Ribosomal protein L13a                      | F | 5'-TCTGGAGGACTGTAAGAGGTATGC-3' | NM_212784.1    |
|                 |                                             | R | 5'-CTAGACGCACAATCTTGAGAGCAG-3' |                |

24

25 **Supplementary Figure Legends**

26 **Figure S1.** Effects of ERR $\alpha$  knockdown on expression of energy metabolism genes from

27 glycolysis (A), TCA cycle (B) and oxidative phosphorylation (C). MOs were injected into

28 embryos at the 1~2 cell stage, and the levels of the indicated mRNAs were analyzed by

29 Q-PCR at 3 dpf, with *rpl13a* as an internal control,. Values are the mean  $\pm$  SD (n = 6).

30 \*Significant difference from the respective control (ctrl MO) group ( $p < 0.05$ , Student's t-test).

31

32 **Figure S2.** A: Effects of MO dosages on the development of zebrafish embryos. Embryos

33 injected with 4ng  $ERR\alpha$  MO showed abnormal development. B: Western blot analysis of

34 effectiveness of  $ERR\alpha$  knockdown (injected with 2ng/embryo) in 3-dpf embryos.  $ERR\alpha$

35 protein detected by anti-mouse  $ERR\alpha$  antibody (Abcam, 1:1000) were observed at ~55 kD.

36 The intensity of signal was decreased in  $ERR\alpha$  morphants.

# Supplementary Figure S1

## A

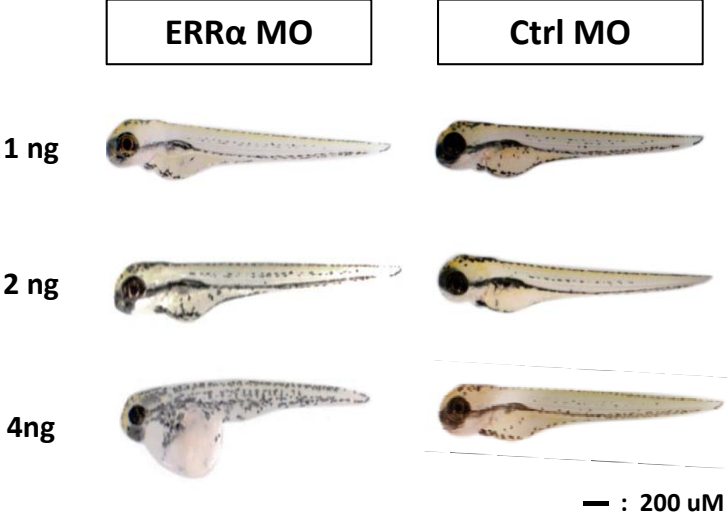

## B

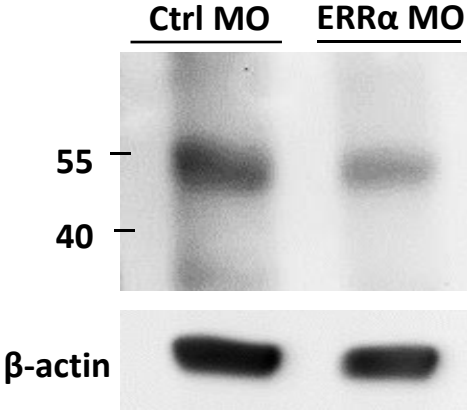

## Supplementary Figure S2

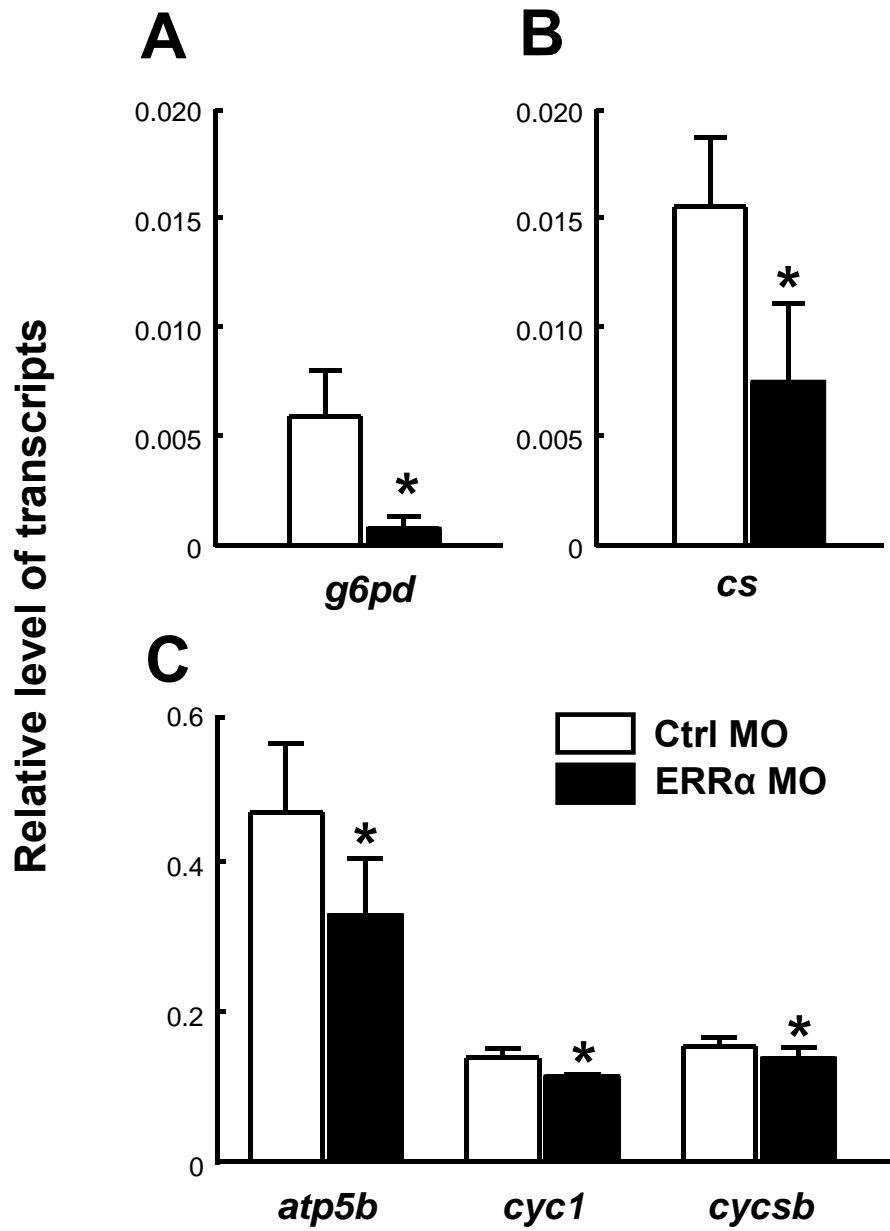

Supplement: rspb20152582supp1.pdf [file rspb20152582supp1.pdf]
